# Supplementary material
Source: PubMed Central journal article supplement (PMC7337259)
Supplement: NIHMS1547940-supplement-2.pdf [file NIHMS1547940-supplement-2.pdf]

**Supplementary Table 1.** Statistical measures of correlation between mean and sectoral variation of ACA width in eyes without PAS below or above parameter-specific change points.

| Parameter | Change-point          | Measurement $\leq$ Change point |                   |          |          | Measurement $>$ Change point |                   |          |          |
|-----------|-----------------------|---------------------------------|-------------------|----------|----------|------------------------------|-------------------|----------|----------|
|           |                       | Rho                             | P value           | Eyes (N) | PACD (N) | Rho                          | P value           | Eyes (N) | PACD (N) |
| AOD500    | 0.097 mm              | 0.630                           | <b>&lt; 0.001</b> | 98       | 91       | 0.321                        | <b>&lt; 0.001</b> | 495      | 160      |
| AOD750    | 0.173 mm              | 0.219                           | <b>&lt; 0.001</b> | 173      | 155      | 0.55                         | <b>&lt; 0.001</b> | 420      | 96       |
| TISA500   | 0.062 mm <sup>2</sup> | 0.536                           | <b>&lt; 0.001</b> | 203      | 164      | 0.122                        | <b>0.004</b>      | 390      | 87       |
| TISA750   | 0.080 mm <sup>2</sup> | 0.628                           | <b>&lt; 0.001</b> | 108      | 95       | 0.275                        | <b>&lt; 0.001</b> | 485      | 156      |
| SSA500    | 10.113°               | 0.679                           | <b>&lt; 0.001</b> | 83       | 76       | -0.036                       | 0.389             | 510      | 175      |
| SSA750    | 12.905°               | 0.166                           | <b>0.029</b>      | 173      | 155      | 0.313                        | <b>&lt; 0.001</b> | 420      | 96       |

AOD = angle opening distance; TISA = trabecular iris space area; SSA = scleral spur angle. 500 or 750 denotes distance in  $\mu\text{m}$  from the scleral spur.

Boldface values indicate statistical significance of Spearman correlation coefficient at  $P < 0.05$ .
