# Supplementary material
Source: PubMed Central journal article supplement (PMC7337259)

# Supplementary Figure 1

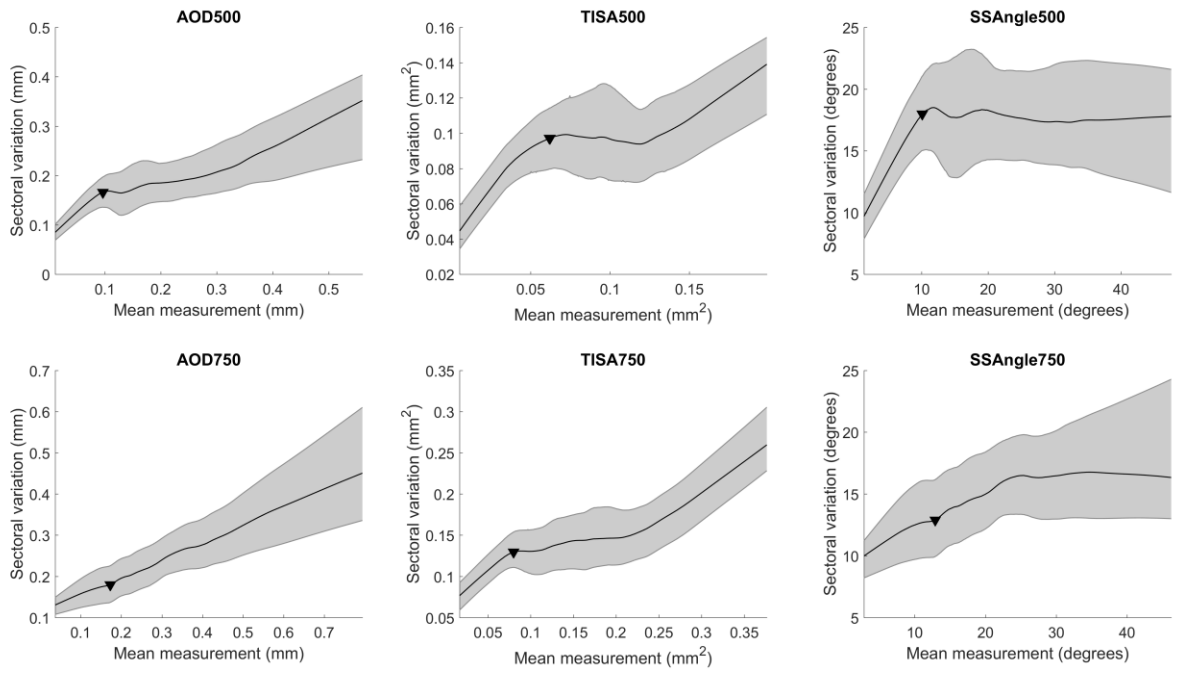

Supplement: NIHMS1547940-supplement-1.pdf [file NIHMS1547940-supplement-1.pdf]
